# Supplementary material
Source: PubMed Central journal article supplement (PMC9799190)
Supplement: glac094_suppl_supplementary_material.pdf [file glac094_suppl_supplementary_material.pdf]

## SUPPLEMENTARY MATERIAL

**Supplementary Table 1: Variables used in frailty index and score assigned**

| Item # | Items                                                                                                                                                                                                                                                         | Response                                                                                                                                                                                                       | Score                          |
|--------|---------------------------------------------------------------------------------------------------------------------------------------------------------------------------------------------------------------------------------------------------------------|----------------------------------------------------------------------------------------------------------------------------------------------------------------------------------------------------------------|--------------------------------|
| 1.     | Self-rated general health                                                                                                                                                                                                                                     | Excellent<br>Very<br>Good<br>Fair<br>Poor                                                                                                                                                                      | 0<br>0.25<br>0.5<br>0.75<br>1  |
| 2.     | During the past 4 weeks, how much of the time have you had any of the following problems with your work or other regular daily activities as a result of any emotional problems (such as feeling depressed or anxious)? Accomplished less than you would like | None of the time<br>A little of the time<br>Some of the time<br>Most of the time<br>All of the time                                                                                                            | 0<br>0.25<br>0.50<br>0.75<br>1 |
| 3.     | During the past 4 weeks, to what extent has your physical health or emotional problems interfered with your normal social activities with family, friends, neighbors, or groups?                                                                              | Not at all<br>Slightly<br>Moderately<br>Quite a bit<br>Extremely                                                                                                                                               | 0<br>0.25<br>0.50<br>0.75<br>1 |
| 4.     | During the past 4 weeks, how much did pain interfere with your normal work (including both work outside the home and housework)?                                                                                                                              | Not at all<br>A little bit<br>Moderately<br>Quite a bit<br>Extremely                                                                                                                                           | 0<br>0.25<br>0.50<br>0.75<br>1 |
| 5.     | How much of the time during the past 4 weeks did you have a lot of energy?                                                                                                                                                                                    | All of the time<br>Most of the time<br>Some of the time<br>A little of the time<br>None of the time                                                                                                            | 0<br>0.25<br>0.50<br>0.75<br>1 |
| 6.     | How much of the time during the past 4 weeks have you felt downhearted and depressed?                                                                                                                                                                         | None of the time<br>A little of the time<br>Some of the time<br>Most of the time<br>All of the time                                                                                                            | 0<br>0.25<br>0.50<br>0.75<br>1 |
| 7.     | During the past 4 weeks, how much of the time has your physical health or emotional problems interfered with your social activities (like visiting friends, relatives, etc.)?                                                                                 | None of the time<br>A little of the time<br>Some of the time<br>Most of the time<br>All of the time                                                                                                            | 0<br>0.25<br>0.50<br>0.75<br>1 |
| 8.     | The following questions are about activities you might do during a typical day. Does your health now limit you in these activities during a typical day? Bathing or dressing yourself                                                                         | No, not limited at all<br>Yes, limited a little<br>Yes, limited a lot                                                                                                                                          | 0<br>0.5<br>1                  |
| 9.     | Sleep                                                                                                                                                                                                                                                         | I can sleep as well as usual<br><br>I don't sleep as well as I used to<br><br>I wake up 1-2 hours earlier than usual and find it hard to get back to sleep.<br><br>I wake up several hours earlier than I used | 0<br><br>0.33<br><br>0.67      |

|     |                                                                                                                                                                                                                                                                       |                                                                                                                                                                                                           |                                           |
|-----|-----------------------------------------------------------------------------------------------------------------------------------------------------------------------------------------------------------------------------------------------------------------------|-----------------------------------------------------------------------------------------------------------------------------------------------------------------------------------------------------------|-------------------------------------------|
|     |                                                                                                                                                                                                                                                                       | to and cannot get back to sleep                                                                                                                                                                           | 1                                         |
| 10. | Do you smoke cigarettes now?                                                                                                                                                                                                                                          | No<br>Yes                                                                                                                                                                                                 | 0<br>1                                    |
| 11. | Self-reported stroke                                                                                                                                                                                                                                                  | No<br>Yes                                                                                                                                                                                                 | 0<br>1                                    |
| 12. | Self-reported heart attack                                                                                                                                                                                                                                            | No<br>Yes                                                                                                                                                                                                 | 0<br>1                                    |
| 13. | Self-reported cancer                                                                                                                                                                                                                                                  | No<br>Yes                                                                                                                                                                                                 | 0<br>1                                    |
| 14. | Self-reported angina                                                                                                                                                                                                                                                  | No<br>Yes                                                                                                                                                                                                 | 0<br>1                                    |
| 15. | Self-reported kidney failure                                                                                                                                                                                                                                          | No<br>Yes                                                                                                                                                                                                 | 0<br>1                                    |
| 16. | Albuminuria                                                                                                                                                                                                                                                           | 0.3-2.9 mg/dl serum creatinine<br>≥3.0 mg/dl serum creatinine                                                                                                                                             | 0.5<br>1                                  |
| 17. | HDL-cholesterol                                                                                                                                                                                                                                                       | < 40 mg/dl (males) or <50 mg/dl (females)                                                                                                                                                                 | 1                                         |
| 18. | Total cholesterol                                                                                                                                                                                                                                                     | < 135.3 or >270.7 mg/dl                                                                                                                                                                                   | 1                                         |
| 19. | Glucose                                                                                                                                                                                                                                                               | <50.5 or >198.2 mg/dl                                                                                                                                                                                     | 1                                         |
| 20. | Overweight/obesity                                                                                                                                                                                                                                                    | BMI 25.0-29.9 kg/m <sup>2</sup><br>BMI ≥30.0 kg/m <sup>2</sup>                                                                                                                                            | 0.5<br>1                                  |
| 21. | Systolic blood pressure                                                                                                                                                                                                                                               | <140 mmHg<br>140-159 mmHg<br>160-179 mmHg<br>≥180 mmHg                                                                                                                                                    | 0<br>0.33<br>0.67<br>1                    |
| 22. | Diastolic blood pressure                                                                                                                                                                                                                                              | ≥90 mmHg                                                                                                                                                                                                  | 1                                         |
| 23. | How would you describe your ability to think and solve day to day problems, during the past four weeks: able to think clearly and solve problems, had a little difficulty, had some difficulty, had a great deal of difficulty, or unable to think or solve problems? | Able to think clearly and solve problems<br>Had a little difficulty<br>Had some difficulty<br>Had a great deal of difficulty<br>Unable to think or solve problems<br>Don't know/Refused                   | 0<br>0.25<br>0.50<br>0.75<br>1<br>Missing |
| 24. | How would you describe your ability to remember things, during the past four weeks: able to remember most things, somewhat forgetful, very forgetful, or unable to remember anything at all?                                                                          | Able to remember most things<br>Somewhat forgetful<br>Very forgetful<br>Unable to remember anything at all<br>Don't know/Refused                                                                          | 0<br>0.33<br>0.67<br>1<br>Missing         |
| 25. | Trouble making decisions?                                                                                                                                                                                                                                             | I make decisions about as well as I ever could.<br>I put off making decisions more than I used to.<br>I have greater difficulty in making decisions than before<br>I can't make decisions at all anymore. | 0<br>0.33<br>0.67<br>1                    |
| 26. | What degree of difficulty do you have walking on a flat surface?                                                                                                                                                                                                      | None<br>Mild<br>Moderately<br>Severe<br>Extreme                                                                                                                                                           | 0<br>0.25<br>0.50<br>0.75<br>1            |
| 27. | Are there times when you stop breathing during your sleep?                                                                                                                                                                                                            | No<br>Yes                                                                                                                                                                                                 | 0<br>1                                    |
| 28. | How severe is your stiffness after first wakening in the morning?                                                                                                                                                                                                     | None<br>Mild                                                                                                                                                                                              | 0<br>0.25                                 |

|     |                                                                                                                                                     |                                                 |                                |
|-----|-----------------------------------------------------------------------------------------------------------------------------------------------------|-------------------------------------------------|--------------------------------|
|     |                                                                                                                                                     | Moderately<br>Severe<br>Extreme                 | 0.50<br>0.75<br>1              |
| 29. | How severe is your stiffness after sitting, lying or resting later in the day?                                                                      | None<br>Mild<br>Moderately<br>Severe<br>Extreme | 0<br>0.25<br>0.50<br>0.75<br>1 |
| 30. | Have you leaked even a small amount of urine or wet yourself in the past 7 days?                                                                    | No<br>Yes                                       | 0<br>1                         |
| 31. | Insulin use                                                                                                                                         | No<br>Yes                                       | 0<br>1                         |
| 32. | During the past four weeks, have you been able to hear what is said in a group conversation with at least three other people without a hearing aid? | No<br>Yes<br>Don't know/Refused                 | 0<br>1<br>Missing              |
| 33. | Worsening of your eyesight?                                                                                                                         | Did not occur<br>Mild<br>Moderate<br>Severe     | 0<br>0.33<br>0.67<br>1         |
| 34. | Sores on your feet that heal poorly?                                                                                                                | Did not occur<br>Mild<br>Moderate<br>Severe     | 0<br>0.33<br>0.67<br>1         |
| 35. | Has your doctor ever told you that you have diabetic neuropathy?                                                                                    | No<br>Yes                                       | 0<br>1                         |

**Supplementary Table 2: Multivariable adjusted association of baseline frailty index categories with risk of incident overall HF, HFpEF, and HFrEF among men and women**

| Groups                                                                                                                                                                                                                                                                                                                                                                                                                                                                                                                                                                                               |                  | Model 1            |         | Model 2           |         | Model 3           |         |
|------------------------------------------------------------------------------------------------------------------------------------------------------------------------------------------------------------------------------------------------------------------------------------------------------------------------------------------------------------------------------------------------------------------------------------------------------------------------------------------------------------------------------------------------------------------------------------------------------|------------------|--------------------|---------|-------------------|---------|-------------------|---------|
|                                                                                                                                                                                                                                                                                                                                                                                                                                                                                                                                                                                                      |                  | HR (95% CI)        | P-value | HR (95% CI)       | P-value | HR (95% CI)       | P-value |
| <b>Overall HF (referent: Tertile 1)</b>                                                                                                                                                                                                                                                                                                                                                                                                                                                                                                                                                              |                  |                    |         |                   |         |                   |         |
| <b>Men</b>                                                                                                                                                                                                                                                                                                                                                                                                                                                                                                                                                                                           | <b>Tertile 2</b> | 2.96 (1.69-5.19)   | <.001   | 2.48 (1.40-4.37)  | 0.002   | 2.01 (1.13-3.56)  | 0.02    |
|                                                                                                                                                                                                                                                                                                                                                                                                                                                                                                                                                                                                      | <b>Tertile 3</b> | 6.45 (3.80-10.95)  | <.001   | 4.80 (2.79-8.24)  | <.001   | 3.09 (1.76-5.44)  | <.001   |
| <b>Women</b>                                                                                                                                                                                                                                                                                                                                                                                                                                                                                                                                                                                         | <b>Tertile 2</b> | 1.32 (0.80-2.19)   | 0.28    | 1.17 (0.70-1.93)  | 0.55    | 0.95 (0.57-1.59)  | 0.83    |
|                                                                                                                                                                                                                                                                                                                                                                                                                                                                                                                                                                                                      | <b>Tertile 3</b> | 1.98 (1.24-3.15)   | 0.004   | 1.49 (0.93-2.40)  | 0.10    | 0.95 (0.57-1.58)  | 0.83    |
| <b>HFpEF (referent: Tertile 1)</b>                                                                                                                                                                                                                                                                                                                                                                                                                                                                                                                                                                   |                  |                    |         |                   |         |                   |         |
| <b>Men</b>                                                                                                                                                                                                                                                                                                                                                                                                                                                                                                                                                                                           | <b>Tertile 2</b> | 3.91 (1.57-9.73)   | 0.004   | 3.28 (1.31-8.21)  | 0.01    | 2.51 (0.99-6.34)  | 0.05    |
|                                                                                                                                                                                                                                                                                                                                                                                                                                                                                                                                                                                                      | <b>Tertile 3</b> | 9.72 (4.10-23.06)  | <.001   | 7.13 (2.97-17.11) | <.001   | 4.34 (1.76-10.73) | 0.002   |
| <b>Women</b>                                                                                                                                                                                                                                                                                                                                                                                                                                                                                                                                                                                         | <b>Tertile 2</b> | 1.54 (0.76-3.10)   | 0.23    | 1.36 (0.67- 2.76) | 0.39    | 1.09 (0.53-2.24)  | 0.81    |
|                                                                                                                                                                                                                                                                                                                                                                                                                                                                                                                                                                                                      | <b>Tertile 3</b> | 2.14 (1.10-4.16)   | 0.02    | 1.63 (0.83- 3.20) | 0.15    | 1.04 (0.51-2.14)  | 0.91    |
| <b>HFrEF (referent: Tertile 1)</b>                                                                                                                                                                                                                                                                                                                                                                                                                                                                                                                                                                   |                  |                    |         |                   |         |                   |         |
| <b>Men</b>                                                                                                                                                                                                                                                                                                                                                                                                                                                                                                                                                                                           | <b>Tertile 2</b> | 2.24 (1.05-4.77)   | 0.04    | 2.06 (0.96-4.42)  | 0.06    | 1.63 (0.75-3.55)  | 0.22    |
|                                                                                                                                                                                                                                                                                                                                                                                                                                                                                                                                                                                                      | <b>Tertile 3</b> | 3.78 (1.82-7.84)   | <.001   | 3.25 (1.53-6.88)  | 0.002   | 2.08 (0.95-4.58)  | 0.07    |
| <b>Women</b>                                                                                                                                                                                                                                                                                                                                                                                                                                                                                                                                                                                         | <b>Tertile 2</b> | 0.89 (0.40 - 2.00) | 0.78    | 0.80 (0.36-1.80)  | 0.60    | 0.64 (0.28 -1.47) | 0.29    |
|                                                                                                                                                                                                                                                                                                                                                                                                                                                                                                                                                                                                      | <b>Tertile 3</b> | 1.56 (0.76 - 3.17) | 0.22    | 1.23 (0.59-2.54)  | 0.58    | 0.76 (0.34 -1.70) | 0.51    |
| Model 1: Adjusted for age, sex, race/ethnicity, and treatment arm;<br>Model 2: Model 1 + Baseline Estimated Fitness (METs)<br>Model 3: Model 2 + history of hypertension, systolic blood pressure, smoking status, drinking status, history of CVD, HbA1c, GFR, BMI<br>Abbreviations: CI, confidence interval; HF, heart failure; HFpEF: Heart failure with preserved ejection fraction; HFrEF: Heart failure with reduced ejection fraction;<br>HR, hazard ratio; SD, standard deviation; CVD, cardiovascular disease; HbA1c, hemoglobin A1c; GFR, Glomerular filtration rate; BMI, Body mass index |                  |                    |         |                   |         |                   |         |

**Supplementary Table 3: Multivariable adjusted association of baseline frailty index (continuous) with risk of incident overall HF, HFpEF, and HFrEF among men and women**

| Groups                                                                                                                                                                                                                                                                                                                                                                                                                                                                                                                                                                                                                                       | Model 1                           |         | Model 2                           |         | Model 3                           |         |
|----------------------------------------------------------------------------------------------------------------------------------------------------------------------------------------------------------------------------------------------------------------------------------------------------------------------------------------------------------------------------------------------------------------------------------------------------------------------------------------------------------------------------------------------------------------------------------------------------------------------------------------------|-----------------------------------|---------|-----------------------------------|---------|-----------------------------------|---------|
|                                                                                                                                                                                                                                                                                                                                                                                                                                                                                                                                                                                                                                              | HR (95% CI)<br>Per 1 SD higher FI | P-value | HR (95% CI)<br>Per 1 SD higher FI | P-value | HR (95% CI)<br>Per 1 SD higher FI | P-value |
| <b>Overall HF</b>                                                                                                                                                                                                                                                                                                                                                                                                                                                                                                                                                                                                                            |                                   |         |                                   |         |                                   |         |
| <b>Men</b>                                                                                                                                                                                                                                                                                                                                                                                                                                                                                                                                                                                                                                   | 1.92 (1.66-2.21)                  | <.001   | 1.74 (1.49, 2.03)                 | <.001   | 1.49 (1.26, 1.76)                 | <.001   |
| <b>Women</b>                                                                                                                                                                                                                                                                                                                                                                                                                                                                                                                                                                                                                                 | 1.50 (1.26- 1.78)                 | <.001   | 1.32 (1.10, 1.58)                 | 0.003   | 1.10 (0.91, 1.35)                 | 0.33    |
| <b>HFpEF</b>                                                                                                                                                                                                                                                                                                                                                                                                                                                                                                                                                                                                                                 |                                   |         |                                   |         |                                   |         |
| <b>Men</b>                                                                                                                                                                                                                                                                                                                                                                                                                                                                                                                                                                                                                                   | 2.05 (1.68- 2.51)                 | <.001   | 1.86 (1.50, 2.30)                 | <.001   | 1.601 (1.26, 2.03)                | <.001   |
| <b>Women</b>                                                                                                                                                                                                                                                                                                                                                                                                                                                                                                                                                                                                                                 | 1.54 (1.22-1.94)                  | <.001   | 1.37 (1.08, 1.74)                 | 0.01    | 1.13 (0.87, 1.47)                 | 0.35    |
| <b>HFrEF</b>                                                                                                                                                                                                                                                                                                                                                                                                                                                                                                                                                                                                                                 |                                   |         |                                   |         |                                   |         |
| <b>Men</b>                                                                                                                                                                                                                                                                                                                                                                                                                                                                                                                                                                                                                                   | 1.76 (1.39, 2.22)                 | <.001   | 1.67 (1.31, 2.14)                 | <.001   | 1.45 (1.11, 1.90)                 | 0.007   |
| <b>Women</b>                                                                                                                                                                                                                                                                                                                                                                                                                                                                                                                                                                                                                                 | 1.34 (1.00, 1.81)                 | 0.05    | 1.20 (0.88, 1.64)                 | 0.24    | 0.98 (0.69, 1.39)                 | 0.91    |
| <p>Model 1: Adjusted for age, sex, race/ethnicity, and treatment arm;<br/>           Model 2: Model 1 + Baseline Estimated Fitness (METs)<br/>           Model 3: Model 2 + history of hypertension, systolic blood pressure, smoking status, drinking status, history of CVD, HbA1c, GFR, BMI<br/>           Abbreviations: CI, confidence interval; HF, heart failure; HFpEF: Heart failure with preserved ejection fraction; HFrEF: Heart failure with reduced ejection fraction; HR, hazard ratio; SD, standard deviation; CVD, cardiovascular disease; HbA1c, hemoglobin A1c; GFR, Glomerular filtration rate; BMI, Body mass index</p> |                                   |         |                                   |         |                                   |         |

**Supplementary Table 4: Multivariable adjusted association of baseline frailty index (continuous) with risk of incident overall HF across tertiles of BMI**

| BMI tertiles                                                                                                                                                                                                                                                                                                                                                                                                                                                                    | Model 1           |         | Model 2           |         | Model 3           |         |
|---------------------------------------------------------------------------------------------------------------------------------------------------------------------------------------------------------------------------------------------------------------------------------------------------------------------------------------------------------------------------------------------------------------------------------------------------------------------------------|-------------------|---------|-------------------|---------|-------------------|---------|
|                                                                                                                                                                                                                                                                                                                                                                                                                                                                                 | HR (95% CI)       | P-value | HR (95% CI)       | P-value | HR (95% CI)       | P-value |
| <i>Continuous frailty measure (HR Per 1 SD (0.07) higher)</i>                                                                                                                                                                                                                                                                                                                                                                                                                   |                   |         |                   |         |                   |         |
| <b>Tertile 1: BMI 24.53 to 32.62 kg/m<sup>2</sup></b>                                                                                                                                                                                                                                                                                                                                                                                                                           | 1.77 (1.41, 2.21) | <0.001  | 1.61 (1.28, 2.02) | <0.001  | 1.38 (1.06, 1.80) | 0.02    |
| <b>Tertile 2: BMI 32.62 to 37.78 kg/m<sup>2</sup></b>                                                                                                                                                                                                                                                                                                                                                                                                                           | 1.74 (1.44, 2.11) | <0.001  | 1.62 (1.33, 1.98) | <0.001  | 1.34 (1.08, 1.66) | 0.009   |
| <b>Tertile 3: 37.78 to 63.53 kg/m<sup>2</sup></b>                                                                                                                                                                                                                                                                                                                                                                                                                               | 1.53 (1.28, 1.84) | <0.001  | 1.42 (1.18, 1.72) | <0.001  | 1.24 (1.01, 1.53) | 0.04    |
| Model 1: Adjusted for age, sex, race/ethnicity, and treatment arm<br>Model 2: Model 1 + Baseline Estimated Fitness (METs)<br>Model 3: Model 2 + history of hypertension, systolic blood pressure, smoking status, drinking status, history of CVD, HbA1c, GFR<br>Abbreviations: CI, confidence interval; HF, heart failure; HR, hazard ratio; SD, standard deviation; CVD, cardiovascular disease; HbA1c, hemoglobin A1c; GFR, Glomerular filtration rate; BMI, Body mass index |                   |         |                   |         |                   |         |

**Supplementary Table 5: Multivariable adjusted association of baseline frailty index with risk of incident overall HF, HFpEF, and HFrEF at 2 years**

|                   | Model 1                           |         | Model 2                           |         | Model 3                           |         |
|-------------------|-----------------------------------|---------|-----------------------------------|---------|-----------------------------------|---------|
|                   | HR (95% CI)<br>Per 1 SD higher FI | P-value | HR (95% CI)<br>Per 1 SD higher FI | P-value | HR (95% CI)<br>Per 1 SD higher FI | P-value |
| <b>Overall HF</b> | 1.68 (1.50-1.89)                  | <.001   | 1.52 (1.34-1.72)                  | <.001   | 1.28(1.11- 1.46)                  | <.001   |
| <b>HFpEF</b>      | 1.78 (1.51-2.09)                  | <.001   | 1.59 (1.34-1.88)                  | <.001   | 1.34 (1.12- 1.62)                 | 0.002   |
| <b>HFrEF</b>      | 1.51 (1.25-1.82)                  | <.001   | 1.40 (1.15-1.71)                  | <.001   | 1.16 (0.93- 1.45)                 | 0.18    |

Model 1: Adjusted for age, sex, race/ethnicity, and treatment arm;

Model 2: Model 1 + Baseline Estimated Fitness (METs)

Model 3: Model 2 + history of hypertension, systolic blood pressure, smoking status, drinking status, history of CVD, HbA1c, GFR, BMI

Abbreviations: CI, confidence interval; HF, heart failure; HFpEF: Heart failure with preserved ejection fraction; HFrEF: Heart failure with reduced ejection fraction; HR, hazard ratio; SD, standard deviation; CVD, cardiovascular disease; HbA1c, hemoglobin A1c; GFR, Glomerular filtration rate; BMI, Body mass index

**Supplementary Table 6: Baseline and follow-up characteristics stratified by year 1 change in frailty index tertiles**

| Variable                                 | Frailty Index         |                        |                        |         |
|------------------------------------------|-----------------------|------------------------|------------------------|---------|
|                                          | Tertile 1<br>(n=1583) | Tertile 2:<br>(n=1570) | Tertile 3:<br>(n=1598) | P-value |
| <b>Baseline Frailty Index</b>            | 0.23 (0.07)           | 0.20 (0.06)            | 0.19 (0.06)            | <.001   |
| <b>Change in Frailty Index by 1-year</b> | -0.07 (0.03)          | -0.01 (0.01)           | 0.05 (0.04)            | <.001   |
| <b>Range of frailty change</b>           | -0.224 to -0.035      | -0.035 to 0.008        | 0.008 to 0.277         |         |
| <i>Baseline variables</i>                |                       |                        |                        |         |
| Age, years                               | 58.6 (6.9)            | 58.8 (6.8)             | 58.9 (6.9)             | 0.40    |
| Women, %                                 | 926 (58.5%)           | 917 (58.4%)            | 981 (61.4%)            | 0.15    |
| White, %                                 | 950 (60.1%)           | 1033 (65.8%)           | 1041 (65.1%)           | <.001   |
| Weight, Kg                               | 99.4 (19.1)           | 100.8 (19.5)           | 101.8 (19.2)           | 0.002   |
| BMI, kg/m <sup>^2</sup>                  | 35.6 (5.8)            | 35.8 (5.9)             | 36.3 (5.9)             | 0.001   |
| Estimated Fitness, METs                  | 7.3 (2.0)             | 7.3 (1.9)              | 7.1 (2.0)              | 0.06    |
| Systolic BP, mmHg                        | 129.6 (18.1)          | 128.8 (16.5)           | 127.9 (16.5)           | 0.02    |
| History of CVD, %                        | 193 (12.2%)           | 194 (12.4%)            | 230 (14.4%)            | 0.12    |
| History of Hypertension, %               | 1306 (82.5%)          | 1313 (83.6%)           | 1329 (83.2%)           | 0.70    |
| Duration of Diabetes                     | 6.6 (6.2)             | 6.5 (6.3)              | 7.1 (6.9)              | 0.03    |
| HbA1c, %                                 | 7.3 (1.2)             | 7.2 (1.2)              | 7.2 (1.1)              | 0.006   |
| GFR, mL/min per 1.73 m <sup>^2</sup> s   | 90.3 (15.6)           | 89.5 (15.8)            | 89.0 (16.3)            | 0.05    |
| ILI treatment group, %                   | 994 (62.8%)           | 804 (51.2%)            | 607 (38.0%)            | <.001   |
| Insulin Use, %                           | 256 (16.7%)           | 202 (13.4%)            | 251 (16.3%)            | 0.03    |
| LDL, mg/dL                               | 112.6 (34.5)          | 111.7 (31.4)           | 111.7 (31.0)           | 0.66    |
| <i>1-Year follow up variables</i>        |                       |                        |                        |         |
| BMI, kg/m <sup>^2</sup>                  | 33.0 (6.0)            | 34.3 (6.1)             | 35.3 (6.1)             | <.001   |
| Change in BMI, %                         | -7.2 (7.7)            | -4.3 (6.6)             | -2.6 (6.2)             | <.001   |
| Change in Estimated Fitness, %           | 18.9 (29.8)           | 13.9 (25.1)            | 8.1 (24.3)             | <.001   |
| Change in Systolic BP, mmHg              | -7.7 (17.0)           | -4.5 (16.2)            | -2.4 (17.3)            | <.001   |
| Change in Systolic BP, %                 | -5.0 (13.0)           | -2.8 (12.6)            | -1.2 (13.4)            | <.001   |
| Change in HbA1c, %                       | -7.7 (12.8)           | -4.6 (11.9)            | -1.6 (12.9)            | <.001   |



|                                                                                                                                                                                                                                                                    | <b>Frailty Index</b>          |                                |                                |                |
|--------------------------------------------------------------------------------------------------------------------------------------------------------------------------------------------------------------------------------------------------------------------|-------------------------------|--------------------------------|--------------------------------|----------------|
| <b>Variable</b>                                                                                                                                                                                                                                                    | <b>Tertile 1<br/>(n=1583)</b> | <b>Tertile 2:<br/>(n=1570)</b> | <b>Tertile 3:<br/>(n=1598)</b> | <b>P-value</b> |
| <p>Data presented as mean (SD) or %. Abbreviation: BMI, Body mass index; METs, Metabolic equivalents; CVD, Cardiovascular disease; GFR, Glomerular filtration rate; HbA1c, hemoglobin A1c; ILI, intensive lifestyle intervention; LDL, Low density lipoprotein</p> |                               |                                |                                |                |

**Supplementary Table 7: Baseline and follow-up characteristics stratified by year 4 change in frailty index tertiles**

| Variable                                                                                                                                                                                                                                                                   | Frailty Index         |                       |                       |                         |
|----------------------------------------------------------------------------------------------------------------------------------------------------------------------------------------------------------------------------------------------------------------------------|-----------------------|-----------------------|-----------------------|-------------------------|
|                                                                                                                                                                                                                                                                            | Tertile 1<br>(n=1493) | Tertile 2<br>(n=1494) | Tertile 3<br>(n=1494) | P-value for<br>tertiles |
| <b>Baseline Frailty Index</b>                                                                                                                                                                                                                                              | 0.23 (0.07)           | 0.20 (0.06)           | 0.20 (0.06)           | <.0001                  |
| <b>Change in Frailty Index by 4-year</b>                                                                                                                                                                                                                                   | -0.06 (0.03)          | 0.00 (0.01)           | 0.08 (0.04)           | <.0001                  |
| <b>Range of change in frailty index</b>                                                                                                                                                                                                                                    | -0.256 to -0.02       | -0.020 to 0.03        | 0.03 to 0.292         | -                       |
| <b>Baseline variables</b>                                                                                                                                                                                                                                                  |                       |                       |                       |                         |
| <b>Age, years</b>                                                                                                                                                                                                                                                          | 58.2 (6.8)            | 58.8 (6.7)            | 59.0 (7.0)            | 0.01                    |
| <b>Women, n (%)</b>                                                                                                                                                                                                                                                        | 892 (59.8)            | 896 (60.0)            | 910 (60.9)            | 0.79                    |
| <b>White, n (%)</b>                                                                                                                                                                                                                                                        | 909 (60.9)            | 982 (65.7)            | 968 (64.8)            | 0.006                   |
| <b>BMI, kg/m<sup>2</sup></b>                                                                                                                                                                                                                                               | 35.4 (5.8)            | 35.8 (5.8)            | 36.5 (6.0)            | <.001                   |
| <b>Estimated Fitness, METs</b>                                                                                                                                                                                                                                             | 7.4 (2.0)             | 7.3 (2.0)             | 7.0 (1.9)             | <.001                   |
| <b>Systolic BP, mmHg</b>                                                                                                                                                                                                                                                   | 129.3 (17.6)          | 128.5 (16.7)          | 128.0 (16.9)          | 0.09                    |
| <b>History of CVD, n (%)</b>                                                                                                                                                                                                                                               | 159 (10.7)            | 183 (12.3)            | 217 (14.5)            | 0.006                   |
| <b>History of Hypertension, n (%)</b>                                                                                                                                                                                                                                      | 1219 (81.7)           | 1231 (82.4)           | 1254 (83.9)           | 0.24                    |
| <b>Duration of Diabetes, years</b>                                                                                                                                                                                                                                         | 6.6 (6.2)             | 6.5 (6.4)             | 7.1 (6.7)             | 0.02                    |
| <b>HbA1c, n (%)</b>                                                                                                                                                                                                                                                        | 7.3 (1.2)             | 7.2 (1.1)             | 7.2 (1.2)             | <.001                   |
| <b>GFR, mL/min per 1.73 m<sup>2</sup></b>                                                                                                                                                                                                                                  | 90.9 (15.4)           | 90.1 (15.5)           | 88.5 (16.5)           | <.001                   |
| <b>ILI treatment group, n (%)</b>                                                                                                                                                                                                                                          | 869 (58.2)            | 738 (49.4)            | 645 (43.2)            | <.001                   |
| <b>Insulin Use, n (%)</b>                                                                                                                                                                                                                                                  | 245 (17.0)            | 183 (12.8)            | 231 (16.0)            | 0.004                   |
| <b>LDL, mg/dL</b>                                                                                                                                                                                                                                                          | 113.2 (33.9)          | 111.0 (31.6)          | 111.4 (31.1)          | 0.14                    |
| <b>4-year follow up variables</b>                                                                                                                                                                                                                                          |                       |                       |                       |                         |
| <b>BMI, kg/m<sup>2</sup></b>                                                                                                                                                                                                                                               | 33.6 (6.1)            | 34.9 (6.2)            | 36.3 (6.5)            | <.001                   |
| <b>Change in BMI, %</b>                                                                                                                                                                                                                                                    | -4.7 (9.7)            | -2.4 (7.7)            | -0.3 (9.0)            | <.001                   |
| <b>Change in Estimated Fitness, %</b>                                                                                                                                                                                                                                      | 6.6 (29.4)            | 2.0 (24.6)            | -1.6 (24.6)           | <.001                   |
| <b>Change in Systolic BP, mmHg</b>                                                                                                                                                                                                                                         | -6.7 (17.8)           | -4.1 (18.2)           | -1.4 (20.7)           | <.001                   |
| <b>Change in Systolic BP, %</b>                                                                                                                                                                                                                                            | -4.3 (13.6)           | -2.3 (14.3)           | -0.1 (16.1)           | <.001                   |
| <b>Change in HbA1c, %</b>                                                                                                                                                                                                                                                  | -5.4 (15.2)           | -0.6 (16.5)           | 2.4 (19.6)            | <.001                   |
| <small>Data presented as mean (SD) or %. Abbreviation: BMI, Body mass index; METs, Metabolic equivalents; CVD, Cardiovascular disease; GFR, Glomerular filtration rate; HbA1c, hemoglobin A1c; ILI, intensive lifestyle intervention; LDL, Low density lipoprotein</small> |                       |                       |                       |                         |

**Supplementary Figure 1: Consort diagram showing the selection of participants included in the study.**

Participants who had follow-up data for calculation of frailty index at year 1 and year 4 and were free of heart failure at the time of follow-up visit were included in the study.

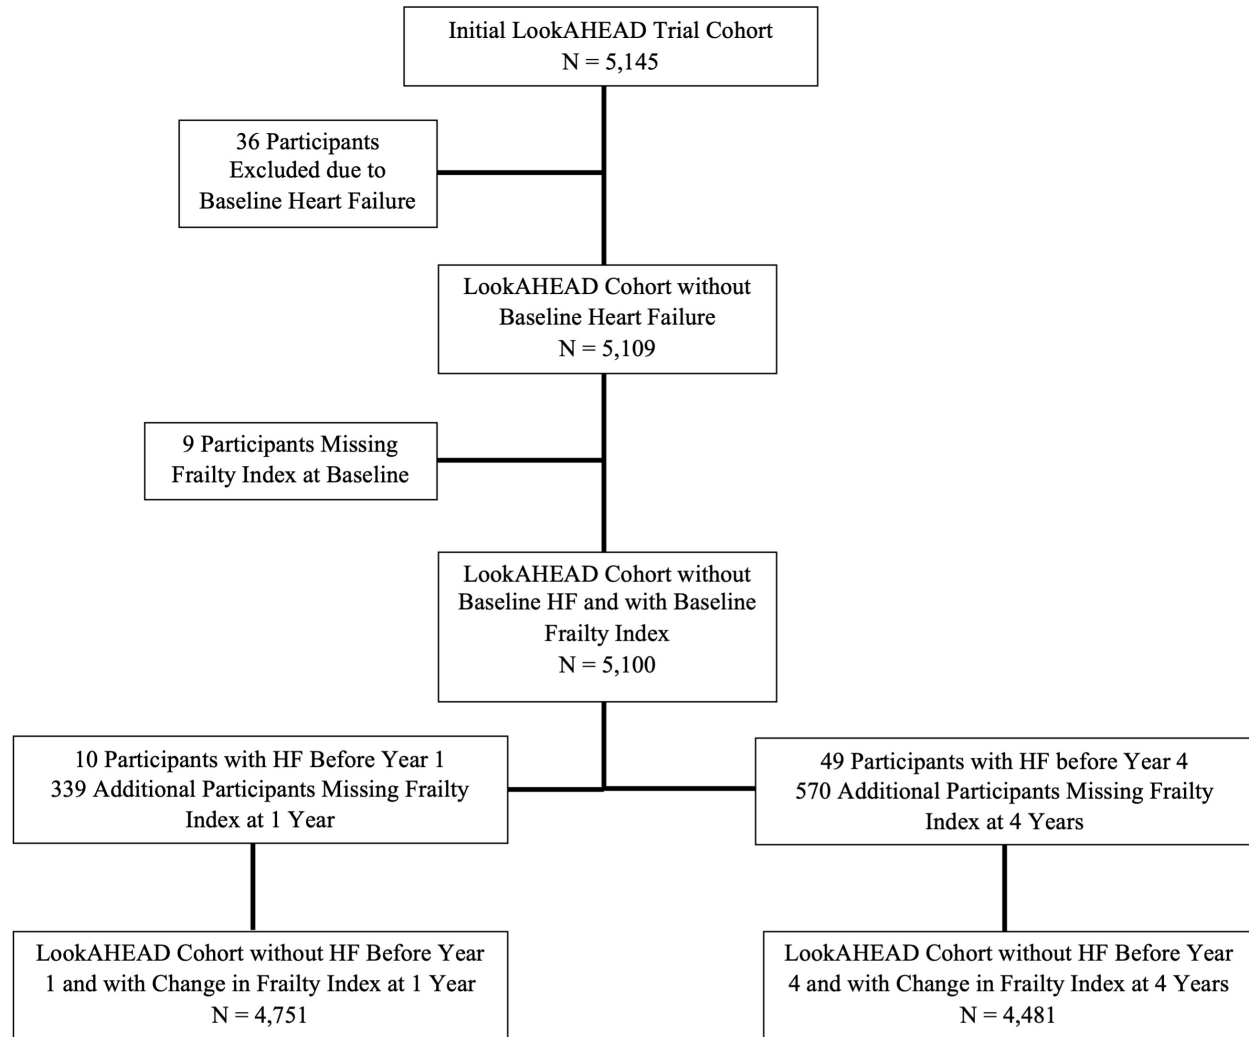

**Supplementary Figure 2: Cumulative incidence of heart failure across baseline frailty index tertiles.**

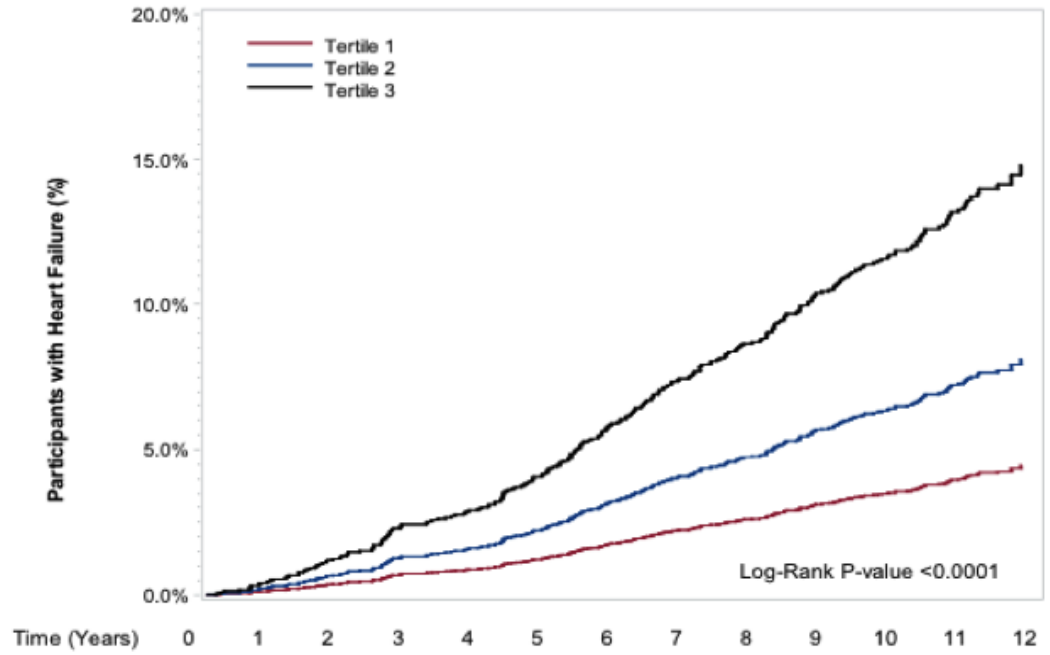

**Supplementary Figure 3: Cumulative incidence of heart failure with preserved ejection fraction (A), and heart failure with reduced ejection fraction (B) across tertiles of baseline frailty index**

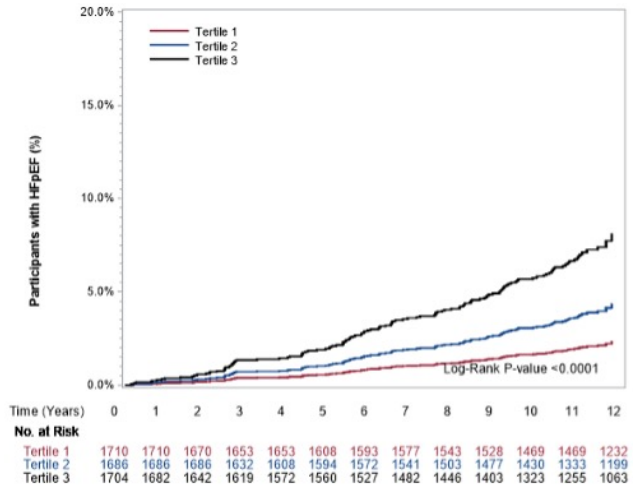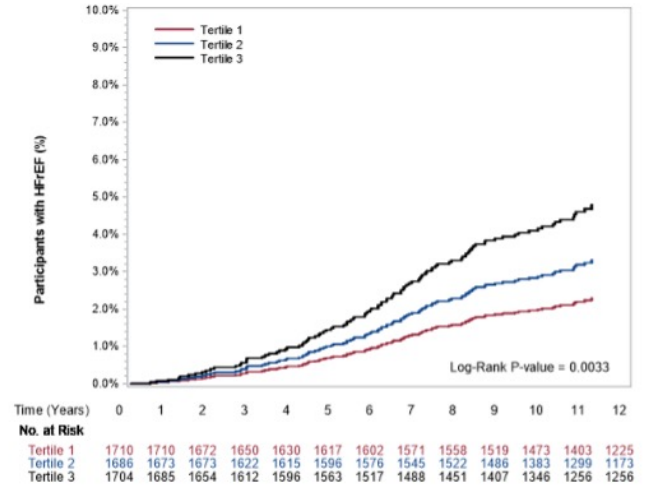

## Appendix:

### Look AHEAD Research Group at End of Continuation

#### Clinical Sites

The Johns Hopkins University Frederick L. Brancati, MD, MHS1\*; Jeanne M. Clark, MD, MPH1 (Co-Principal Investigators); Lee Swartz2 ; Jeanne Charleston, RN3 ; Lawrence Cheskin, MD3 ; Richard Rubin, PhD3\*; Jean Arceci, RN; David Bolen; Danielle Diggins; Mia Johnson; Joyce Lambert; Sarah Longenecker; Kathy Michalski, RD; Dawn Jiggetts; Chanchai Sapun; Maria Sowers; Kathy Tyler \*deceased

Pennington Biomedical Research Center George A. Bray, MD1 ; Allison Strate, RN2 ; Frank L. Greenway, MD3 ; Donna H. Ryan, MD3 ; Donald Williamson, PhD3 ; Timothy Church, MD3 ; Catherine Champagne, PhD, RD; Valerie Myers, PhD; Jennifer Arceneaux, RN; Kristi Rau; Michelle Begnaud, LDN, RD, CDE; Barbara Cerniauskas, LDN, RD, CDE; Crystal Duncan, LPN; Helen Guay, LDN, LPC, RD; Carolyn Johnson, LPN, Lisa Jones; Kim Landry; Missy Lingle; Jennifer Perault; Cindy Puckett; Marisa Smith; Lauren Cox; Monica Lockett, LPN

The University of Alabama at Birmingham Cora E. Lewis, MD, MSPH1 ; Sheikilya Thomas, PhD, MPH2 ; Monika Safford, MD3 ; Stephen Glasser, MD3 ; Vicki DiLillo, PhD3 ; Gareth Dutton, PhD, Charlotte Bragg, MS, RD, LD; Amy Dobelstein; Sara Hannum; Anne Hubbell, MS; Jane King, MLT; DeLavallade Lee; Andre Morgan; L. Christie Oden; Janet Wallace, MS; Cathy Roche, PhD, RN, BSN; Jackie Roche; Janet Turman

#### Harvard Center

*Massachusetts General Hospital:* David M. Nathan, MD1 ; Enrico Cagliero, MD3 ; Heather Turgeon, RN, BS, CDE2 ; Barbara Steiner, EdM; Valerie Goldman, MS, RDN2 ; Linda Delahanty, MS, RDN3 ; Ellen Anderson, MS, RDN3 ; Laurie Bissett, MS, RDN; Christine Stevens, RN; Mary Larkin, RN; Kristen Dalton, BS, Roshni Singh, BS

*Joslin Diabetes Center:* Edward S. Horton, MD1 ; Sharon D. Jackson, MS, RD, CDE2 ; Osama Hamdy, MD, PhD3 ; A. Enrique Caballero, MD3 ; Sarah Bain, BS; Elizabeth McKinney, BSN, RN; Barbara Fagnoli, MS, RD; Jeanne Spellman, BS, RD; Kari Galuski, RN; Ann Goebel-Fabbri, PhD; Lori Lambert, MS, RD; Sarah Ledbury, MEd, RD; Maureen Malloy, BS; Kerry Ovalle, MS, RCEP, CDE

*Beth Israel Deaconess Medical Center:* George Blackburn, MD, PhD1\* Christos Mantzoros, MD, DSc3 ; Ann McNamara, RN  
\*deceased

University of Colorado Anschutz Medical Campus James O. Hill, PhD1 ; Marsha Miller, MS RD2 ; Holly Wyatt, MD3 , Brent Van Dorsten, PhD3 ; Judith Regensteiner, PhD3 ; Debbie Bochert; Gina Claxton-Malloy RD Ligia Coelho, BS; Paulette Cohrs, RN, BSN; Susan Green;

April Hamilton, BS, CCRC; Jere Hamilton, BA; Eugene Leshchinskiy; Loretta Rome, TRS; Terra Thompson, BA, Kirstie Craul, RD, CDE; Cecilia Wang, MD

Baylor College of Medicine John P. Foreyt, PhD1 ; Rebecca S. Reeves, DrPH, RD2 ; Molly Gee, MEd, RD2 ; Henry Pownall, PhD3 ; Ashok Balasubramanyam, MBBS3 ; ChuHuang Chen, MD, PhD3 ; Peter Jones, MD3 ; Michele Burrington, RD, RN; Allyson Clark Gardner, MS, RD; Sharon Griggs; Michelle Hamilton; Veronica Holley; Sarah Lee; Sarah Lane Liscum, RN, MPH; Susan Cantu-Lumbreras; Julieta Palencia, RN; Jennifer Schmidt; Jayne Thomas, RD; Carolyn White; Charlyne Wright, RN; Monica Alvarez, PCT

The University of Tennessee Health Science Center

University of Tennessee East: Karen C. Johnson, MD, MPH1 ; Karen L. Wilson, BSN2 ; Mace Coday, PhD3 ; Beate Griffin, RN, BS; Donna Valenski; Polly Edwards; Brenda Fonda; Kim Ward

*University of Tennessee Downtown:* Helmut Steinburg, MD3 ; Carolyn Gresham, BSN2 ; Moana Mosby, RN; Debra Clark, LPN; Donna Green RN; Abbas E. Kitabchi, PhD, MD (retired)

University of Minnesota Robert W. Jeffery, PhD1 ; Tricia Skarphol, MA2 ; John P. Bantle, MD3 ; J. Bruce Redmon, MD3 ; Richard S. Crow, MD3 ; Scott J. Crow, MD3 ; Manami Bhattacharya, BS; Cindy Bjerk, MS, RD; Kerrin Brejle, MPH, RD; Carolyne Campbell; Mary Ann Forseth, BA; Melanie Jaeb, MPH, RD; Philip Lacher, BBA; Patti Laqua, BS, RD; Birgitta I. Rice, MS, RPh, CHES; Ann D. Tucker, BA; Mary Susan Voeller, BA

St. Luke's Roosevelt Hospital Center Xavier Pi-Sunyer, MD1 ; Jennifer Patricio, MS2 ; Carmen Pal, MD3 ; Lynn Allen, MD; Janet Crane, MA, RD, CDN; Lolline Chong, BS, RD; Diane Hirsch, RNC, MS, CDE; Mary Anne Holowaty, MS, CN; Michelle Horowitz, MS, RD; Les James; Raashi Mamtani, MS

University of Pennsylvania Thomas A. Wadden, PhD1 ; Barbara J. Maschak-Carey, MSN, CDE2 ; Robert I. Berkowitz, MD3 ; Gary Foster, PhD3 ; Henry Glick, PhD3 ; Shiriki Kumanyika, PhD RD, MPH3 ; Yuliis Bell, BA; Raymond Carvajal, PsyD; Helen Chomentowski; Renee Davenport; Lucy Faulconbridge, PhD; Louise Hesson, MSN, CRNP; Sharon Leonard, RD; Monica Mullen, RD, MPH

University of Pittsburgh John M. Jakicic, PhD1 ; David E. Kelley, MD1 ; Jacqueline Wesche-Thobaben, RN, BSN, CDE2 ; Daniel Edmundowicz, MD3 ; Lin Ewing, PhD, RN3 ; Andrea Hergenroeder, PhD, PT, CCS3 ; Mary L. Klem, PhD, MLIS3 ; Mary Korytkowski, MD3 ; Andrea Kriska, PhD3 ; Lewis H. Kuller, MD, DrPH3 ; Amy D. Rickman, PhD, RD, LDN3 ; Rose Salata, MD3 ; Monica E. Yamamoto, DrPH, RD, FADA3 ; Janet Bonk, RN, MPH; Susan Copelli, BS, CTR; Rebecca Danchenko, BS; Tammy DeBruce, BA; Barbara Elnyczky; David O. Garcia, PhD; George A. Grove, MS; Patricia H. Harper, MS, RD, LDN; Susan Harrier, BS; Diane Heidingsfelder, MS, RD, CDE, LDN; Nicole L. Helbling, MS, RN; Diane Ives, MPH; Janet Krulia, RN, BSN, CDE; Juliet Mancino, MS, RD, CDE, LDN; Anne Mathews, PhD, RD, LDN; Lisa Martich, BS, RD, LDN; Meghan McGuire, MS; Tracey Y. Murray, BS; Anna Peluso,

MS; Karen Quirin; Jennifer Rush, MPH; Joan R. Ritchea; Linda Semler, MS, RD, LDN; Karen Vujevich, RN-BC, MSN, CRNP; Kathy Williams, RN, MHA; Donna L. Wolf, PhD

The Miriam Hospital/Brown Medical School Rena R. Wing, PhD1 ; Renee Bright, MS2 ; Vincent Pera, MD3 ; Deborah Tate, PhD3 ; Amy Gorin, PhD3 ; Kara Gallagher, PhD3 ; Amy Bach, PhD; Barbara Bancroft, RN, MS; Anna Bertorelli, MBA, RD; Richard Carey, BS; Tatum Charron, BS; Heather Chenot, MS; Kimberley Chula-Maguire, MS; Pamela Coward, MS, RD; Lisa Cronkite, BS; Julie Currin, MD; Maureen Daly, RN; Caitlin Egan, MS; Erica Ferguson, BS, RD; Linda Foss, MPH; Jennifer Gauvin, BS; Don Kieffer, PhD; Lauren Lessard, BS; Deborah Maier, MS; JP Massaro, BS; Tammy Monk, MS; Rob Nicholson, PhD; Erin Patterson, BS; Suzanne Phelan, PhD; Hollie Raynor, PhD, RD; Douglas Raynor, PhD; Natalie Robinson, MS, RD; Deborah Robles; Jane Tavares, BS

The University of Texas Health Science Center at San Antonio Helen P. Hazuda, PhD1 ; Maria G. Montez, RN, MSHP, CDE2 ; Carlos Lorenzo, MD3 ; Charles F. Coleman, MS, RD; Domingo Granado, RN; Kathy Hathaway, MS, RD; Juan Carlos Isaac, RC, BSN; Nora Ramirez, RN, BSN

VA Puget Sound Health Care System / University of Washington Steven E. Kahn, MB, ChB1 ; Anne Kure, BS2 ; Edward J. Boyko, MD, MPH3 ; Edward Lipkin, MD, PhD3 ; Dace Trence, MD3 ; Subbulaxmi Trikudanathan, MD, MRCP, MMSc3 ; Elaine Tsai, MD3 ; Brenda Montgomery, RN, MS, CDE; Ivy Morgan-Taggart; Jolanta Socha, BS; Lonnesse Taylor, RN, BS; Alan Wesley, BA

Southwestern American Indian Center, Phoenix, Arizona and Shiprock, New Mexico William C. Knowler, MD, DrPH1 ; Paula Bolin, RN, MC2 ; Tina Killian, BS2 ; Maria Cassidy-Begay, BSND, RND 2 ; Katie Toledo, MS, LPC2 ; Cathy Manus, LPN3 ; Jonathan Krakoff, MD3 ; Jeffrey M. Curtis, MD, MPH3 ; Sara Michaels, MD3 ; Paul Bloomquist, MD3 ; Peter H. Bennett, MB, FRCP3 ; Bernadita Fallis, RN, RHIT, CCS; Diane F. Hollowbreast; Ruby Johnson; Maria Meacham, BSN, RN, CDE; Christina Morris, BA; Julie Nelson, RD; Carol Percy, RN, MS; Patricia Poorthunder; Sandra Sangster; Leigh A. Shovestull, RD, CDE; Miranda Smart; Janelia Smiley; Teddy Thomas, BS

University of Southern California Anne Peters, MD1 ; Siran Ghazarian, MD2 ; Elizabeth Beale, MD3 ; Kati Konersman, RD, CDE; Brenda Quintero-Varela; Edgar Ramirez; Gabriela Rios, RD; Gabriela Rodriguez, MA; Valerie Ruelas MSW, LCSW; Sara SerafinDokhan; Martha Walker, RD

### **Coordinating Center**

Wake Forest University Mark A. Espeland, PhD1 ; Judy L. Bahnson, BA, CCRP3 ; Lynne E. Wagenknecht, DrPH1 ; David Reboussin, PhD3 ; W. Jack Rejeski, PhD3 ; Alain G. Bertoni, MD, MPH3 ; Wei Lang, PhD3 ; David Lefkowitz, MD3\* Patrick S. Reynolds, MD3 ; Denise Houston, PhD3 ; Mike E. Miller, PhD3 ; Laura D. Baker, PhD3 ; Nicholas Pajewski, PhD3 ; Stephen R. Rapp, PhD3 ; Stephen Kritchevsky, PhD3 ; Haiying Chen, PhD, MM3 ; Valerie Wilson, MD3 ; Delia S. West, PhD3 ; Ron Prineas, MD3 ; Tandaw Samdarshi, MD3 ; Amelia Hodges, BS, CCRP2 ; Karen Wall2 ; Carrie C. Williams, MA, CCRP2 ; Andrea Anderson, MS;



Jerry M. Barnes, MA; Tara D. Beckner; Delilah R. Cook; Valery S. Effeo, MD, MS; Melanie Franks, BBA; Katie Garcia, MS; Sarah A. Gaussoin, MS; Candace Goode; Michelle Gordon, MS; Lea Harvin, BS; Mary A. Hontz, BA; Don G. Hire, BS; Patricia Hogan, MS; Mark King, BS; Kathy Lane, BS; Rebecca H. Neiberg, MS; Julia T. Rushing, MS; Debbie Steinberg, BS; Jennifer Walker, MS; Michael P. Walkup, MS \*deceased

### **Central Resources Centers**

Central Laboratory, Northwest Lipid Metabolism and Diabetes Research Laboratories Santica M. Marcovina, PhD, ScD1 ; Jessica Hurting<sup>2</sup> ; John J. Albers, PhD<sup>3</sup> , Vinod Gaur, PhD<sup>4</sup>

ECG Reading Center, EPICARE, Wake Forest University School of Medicine Elsayed Z. Soliman MD, MSc, MS<sup>1</sup> ; Charles Campbell <sup>2</sup> ; Zhu-Ming Zhang, MD<sup>3</sup> ; Mary Barr; Susan Hensley; Julie Hu; Lisa Keasler; Yabing Li, MD

Hall-Foushee Communications, Inc. Richard Foushee, PhD; Nancy J. Hall, MA

### **Federal Sponsors**

National Institute of Diabetes and Digestive and Kidney Diseases Mary Evans, PhD; Van S. Hubbard, MD, PhD; Susan Z. Yanovski, MD

National Heart, Lung, and Blood Institute Lawton S. Cooper, MD, MPH; Peter Kaufman, PhD, FABMR; Mario Stylianou, PhD

Centers for Disease Control and Prevention Edward W. Gregg, PhD; Ping Zhang, PhD

<sup>1</sup>Principal Investigator

<sup>2</sup>Program Coordinator

<sup>3</sup>Co-Investigator

All other Look AHEAD staffs are listed alphabetically by site.
